# Supplementary material for: High-performance organic semiconductors for thin-film transistors based on 2,7-divinyl[1]benzothieno[3,2-b]benzothiophene
Source: Royal Society of Chemistry journal article supplement (doi:10.1039/b808438f), 2008-01-01
Supplement: b808438f.pdf [file b808438f.pdf]

## Supplementary data

### High-Performance Organic Semiconductors for Thin-Film Transistors Based on 2,7-

### Divinyll[1]benzothieno[3,2-b]benzothiophene

Myoung-Chul Um,<sup>a</sup> Jeonghun Kwak,<sup>b</sup> Jung-Pyo Hong,<sup>a</sup> Jihoon Kang,<sup>a</sup> Do Yeung Yoon,<sup>a</sup> Seong Hoon Lee,<sup>a</sup> Changhee Lee,<sup>\*b</sup> and Jong-In Hong<sup>\*a</sup>

<sup>a</sup>*Department of Chemistry, College of Natural Sciences, Seoul National University, Seoul 151-747, Korea. Fax: 82-2-889-1568; Tel: 82-2-880-6682; E-mail: jihong@snu.ac.kr*

<sup>b</sup>*School of Electrical Engineering and Computer Science, Seoul National University Kwanak P.O. Box 34, Seoul 151-600, Korea. Fax: 82-2-872-6451; Tel: 82-2-880-9559; E-mail: chlee7@snu.ac.kr*

#### 1. Measurements

The <sup>1</sup>H and <sup>13</sup>C NMR spectra were recorded in CDCl<sub>3</sub> and DMSO-*d*<sub>6</sub> using an Advance 300 MHz Bruker spectrometer. The <sup>1</sup>H NMR and <sup>13</sup>C NMR chemical shifts in CDCl<sub>3</sub> were reported relative to those in CHCl<sub>3</sub> (7.27 ppm and 77.23 ppm, respectively). The TGA analyses were performed on a TGA Q50 TA instrument at 10 °C min<sup>-1</sup> under a nitrogen atmosphere. The DSC analyses were performed on a DSC2910 TA instrument at 10 °C min<sup>-1</sup> under nitrogen flow. The UV-vis absorption spectra were recorded on a Beckman Coulter DU 800 spectrophotometer using quartz cells with path lengths of 2.5 cm. For solid-state measurements, the oligomers were thermally evaporated in a vacuum chamber on quartz plates to form 300-Å-thick films at a deposition rate of 0.5 Å s<sup>-1</sup>. The XRD analyses were carried out at room temperature with a Mac Science (M18XHF-22) diffraction meter using CuKα radiation as the X-ray source at 50 kV and 100 mA. The data were collected in the conventional  $\theta$ -2 $\theta$  configuration (2.5–30°) from thin films thermally evaporated on SiO<sub>2</sub>/Si substrates in a vacuum chamber to form 300-Å-thick films at a rate of 0.5 Å s<sup>-1</sup>. The AFM images of the vacuum-deposited thin films were recorded using a PSIA XE-100 Advanced Scanning Microscope. The voltammetric apparatus used was a CH Instruments model 700C electrochemical workstation. The cyclic voltammograms (CVs) were obtained at room temperature in a three-electrode cell equipped with a working electrode (Au), a reference electrode (Ag/AgCl), and a counter electrode (Pt) in dichlorobenzene containing tetrabutylammonium

hexafluorophosphate ( $\text{Bu}_4\text{N}^+\text{PF}_6^-$ , 0.1 M) as the supporting electrolyte at a scan rate of 100 mV/s. All the potentials were calibrated with the standard ferrocene/ferrocenium redox couple ( $E = +0.41$  V measured). The field-effect measurements were carried out using top-contact FETs. TFT devices with a channel length ( $L$ ) of 50  $\mu\text{m}$  and a channel width ( $W$ ) of 1000  $\mu\text{m}$  were fabricated on thermally oxidized highly n-doped silicon substrates. The  $\text{SiO}_2$  gate dielectric was 300 nm in thickness. The organic semiconductor (300 Å) was evaporated ( $0.1 \text{ \AA s}^{-1}$  at  $1 \times 10^{-6}$  torr) onto a non-pretreated or octadecyltrichlorosilane (OTS)-pretreated oxide surface. Gold source/drain electrodes were evaporated on top of the films through a shadow mask. All the measurements were performed at room temperature using a 4155C Agilent semiconductor parameter analyzer, and the mobilities ( $\mu$ ) were calculated in the saturation regime by using the relationship  $\mu_{\text{sat}} = (2I_{\text{DS}}L)/(WC(V_{\text{g}} - V_{\text{th}})^2)$ , where  $I_{\text{DS}}$  is the source-drain saturation current;  $C$  ( $1.18 \times 10^{-8}$  F), the oxide capacitance;  $V_{\text{g}}$ , the gate voltage;  $V_{\text{th}}$ , the threshold voltage.

## 2. Synthetic Details

All chemicals were purchased from Aldrich and Lancaster.

### 2,7-Dihydroxymethyl[1]benzothieno[3,2-b]benzothiophene

To a solution of [1]benzothieno[3,2-b]benzothiophene-2,7-dicarboxylates (1.50 g, 3.9 mmol) in THF (40 mL) was added  $\text{LiAlH}_4$  (0.74 g, 19.5 mmol). The reaction mixture was stirred overnight. The insoluble material was removed by filtration and washed with hot DMSO. The filtrate and washings were collected, and the product was precipitated by adding 50 mL of 1 N HCl. The product was collected by filtration to afford 1.86 g (75%) of pure 2,7-dihydroxymethyl[1]benzothieno[3,2-b]benzothiophene.  $^1\text{H}$  NMR (300 MHz, DMSO):  $\delta$  8.05 (s, 2H), 7.98 (d, 2H,  $J = 8.1$  Hz), 7.48 (d, 2H,  $J = 8.2$  Hz), 5.38 (t, 2H,  $J = 5.6$  Hz), 4.69 (d, 4H,  $J = 5.3$  Hz).

### 2,7-Dibromomethyl[1]benzothieno[3,2-b]benzothiophene

Phosphorus tribromide (3.24 g, 11.9 mmol) was added dropwise to a suspension of 2,7-dihydroxymethyl [1]benzothieno[3,2-b]benzothiophene (0.9 g, 2.99 mmol) in DMF (20 mL) at 0 °C. Upon the formation of a yellow precipitate, the mixture was warmed to room temperature and stirred for 4 h. The solids were

collected by filtration and were washed with water and hexane to afford 2,7-bis(dibromomethyl)[1]benzothieno[3,2-b]benzothiophene as a yellow solid (1.1 g, 78%). The product was further purified by recrystallization from DMF.  $^1\text{H}$  NMR (300 MHz, DMSO):  $\delta$  8.24 (s, 2H), 8.08 (d, 2H,  $J = 8.2$  Hz), 7.63 (d, 2H,  $J = 8.1$  Hz), 4.91 (s, 4H).

### **2,7-Bis(diethylphosphorylmethyl)[1]benzothieno[3,2-b] benzothiophene**

2,7-dibromomethyl[1]benzothieno[3,2-b]benzothiophene (1.1 g, 2.58 mmol) was added to triethylphosphite (30 mL), and the resulting solution was refluxed for 12 h. The solvent was removed in vacuo, and the residue was purified by column chromatography on silica gel using ethyl acetate/dichloromethane (2:1) as the eluent to obtain the product in 90% yield.  $^1\text{H}$  NMR (300 MHz,  $\text{CDCl}_3$ ):  $\delta$  7.87 (s, 2H), 7.84 (d, 2H,  $J = 8.2$  Hz), 7.42 (d, 2H,  $J = 8.1$  Hz), 4.05 (m, 8H), 3.36 (d, 4H,  $J = 21.5$  Hz), 1.27 (t, 12H,  $J = 7.0$  Hz).  $^{13}\text{C}$  NMR (75 MHz,  $\text{CDCl}_3$ ): (142.62, 142.58), 133.18, 131.90, (128.79, 128.67), (126.92, 126.84), (124.98, 124.88), 121.40, (62.33, 62.24), (34.81, 32.97), (16.45, 16.37).

### **2,7-Bis(2-cyclohexylvinyl)[1]benzothieno[3,2-b]benzothiophene (DCV-BTBT)**

LDA (1.5 M in cyclohexane, 4.0 mL, 6.0 mmol) was added dropwise to a stirred solution of 2,7-bis(diethylphosphorylmethyl)[1]benzothieno[3,2-b] benzothiophene (1.3 g, 2.41 mmol) in anhydrous THF (50 mL) at  $-78$  °C under a nitrogen atmosphere. The mixture was stirred for 1 h, and then, cyclohexanecarbaldehyde (0.67 g, 6.02 mmol) in THF (10 mL) was added dropwise over a period of 10 min. After the mixture was stirred for 2 h at  $-78$  °C and for 12 h at room temperature, 5 mL of water was added, and the solvent was evaporated. The residue was washed with water and MeOH. The desired product was separated by sublimation. High-resolution mass spectrometry (HRMS): Calcd. for  $\text{C}_{30}\text{H}_{32}\text{S}_2$ : 456.1945. Found: 456.1951. Anal. Calcd for CHS: C, 78.90; H, 7.06; S, 14.04. Found: C, 78.48; H, 7.14; S, 14.36.

### **2,7-Distyryl[1]benzothieno[3,2-b]benzothiophene (DPV-BTBT)**

LDA (1.5 M in cyclohexane, 4.0 mL, 6.0 mmol) was added dropwise to a stirred solution of 2,7-bis(diethylphosphorylmethyl)[1]benzothieno[3,2-b] benzothiophene (1.3 g, 2.41 mmol) in anhydrous THF (50

mL) at  $-78\text{ }^{\circ}\text{C}$  under a nitrogen atmosphere. The mixture was stirred for 1 h, and then, benzaldehyde (0.67 g, 6.0 mmol) in THF (20 mL) was added dropwise over a period of 10 min. After the mixture was stirred for 2 h at  $-78\text{ }^{\circ}\text{C}$  and for 12 h at room temperature, 5 mL of water was added, and the solvent was evaporated. The residue was washed with water and MeOH. The desired product was separated by sublimation. HRMS: Calcd. for  $\text{C}_{30}\text{H}_{20}\text{S}_2$ : 444.1006. Found: 444.1008. Anal. Calcd. For CHS: C, 81.04; H, 4.53; S, 14.42. Found: C, 81.04; H, 4.55; S, 14.40.

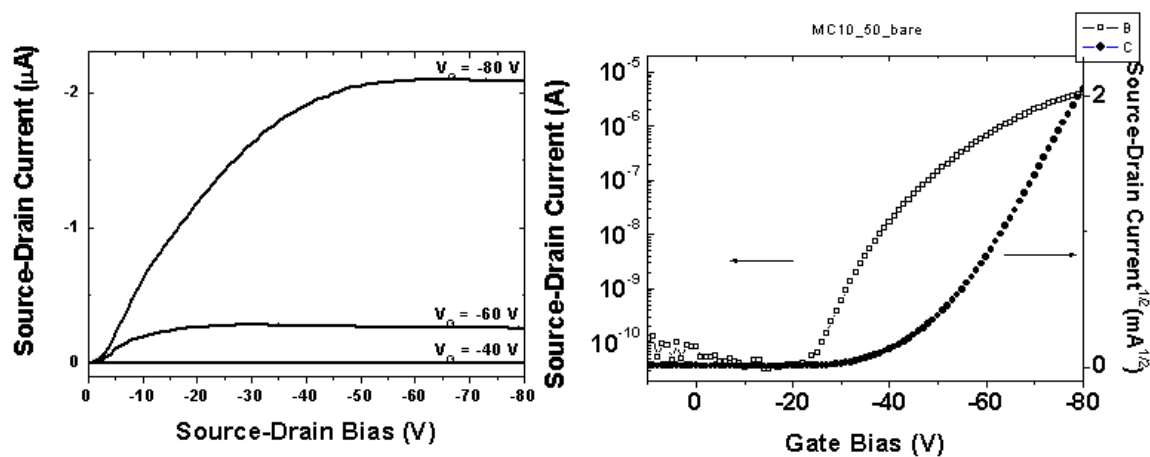

**Figure S1.** Source-drain current ( $I_{\text{DS}}$ ) versus source-drain voltage ( $V_{\text{DS}}$ ) at various gate voltage ( $V_G$ ) for top-contact field-effect transistor using DCV-BTBT deposited at  $T_{\text{sub}} = 50\text{ }^\circ\text{C}$  on  $\text{SiO}_2$ . The transfer characteristics in the saturation regime at a constant source-drain voltage ( $V_{\text{DS}} = -100\text{ V}$ ) are also included (fresh device).

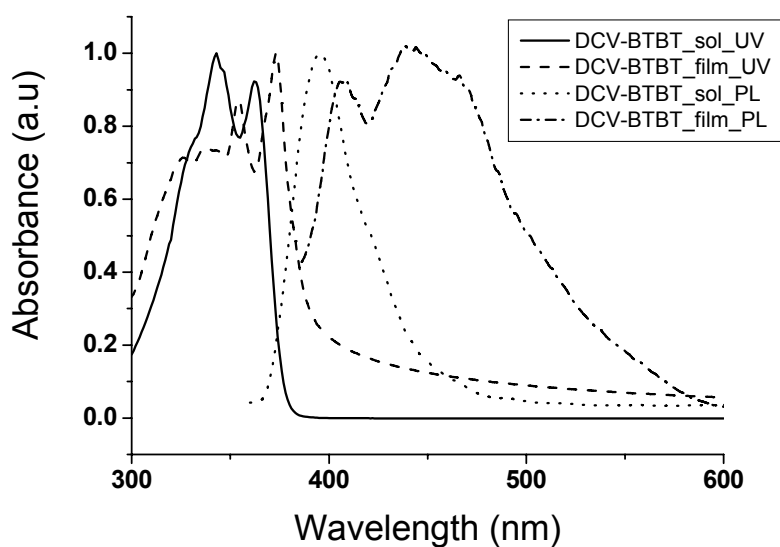

**Figure S2.** UV-vis absorption spectra of DCV-BTBT in xylene.

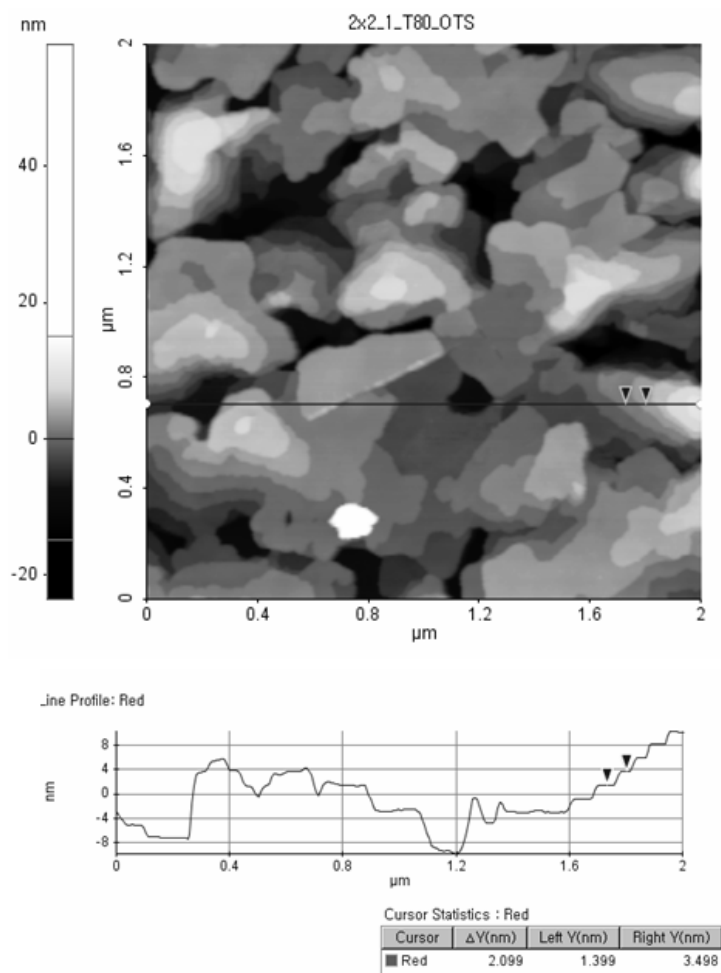

**Figure S3.** AFM images of thin films on the OTS-treated SiO<sub>2</sub> substrates of DPV-BTBT at 80 °C.

### DCV-BTBT

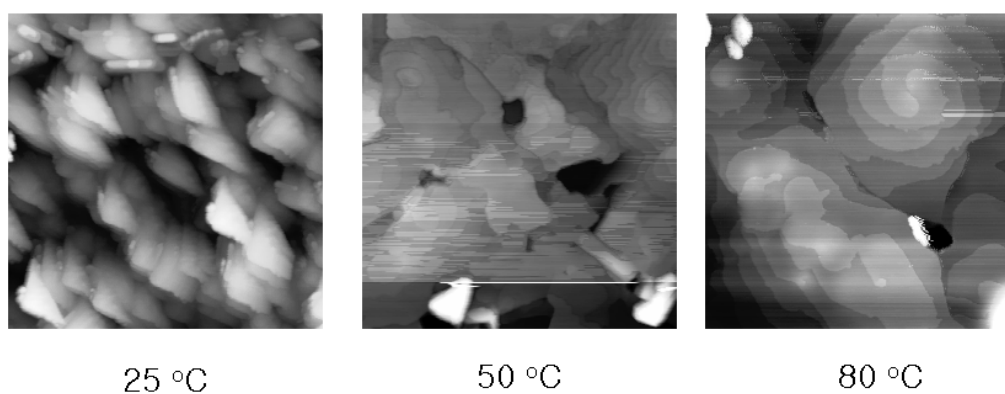

**Figure S4.** AFM images of thin films on the OTS-treated SiO<sub>2</sub> substrates of DCV-BTBT at 25, 50, 80 °C.

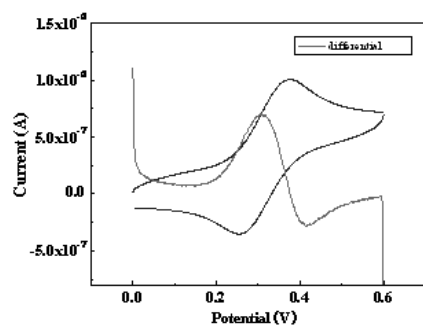

**Cyclic Voltammogram of FOC(0.31)**

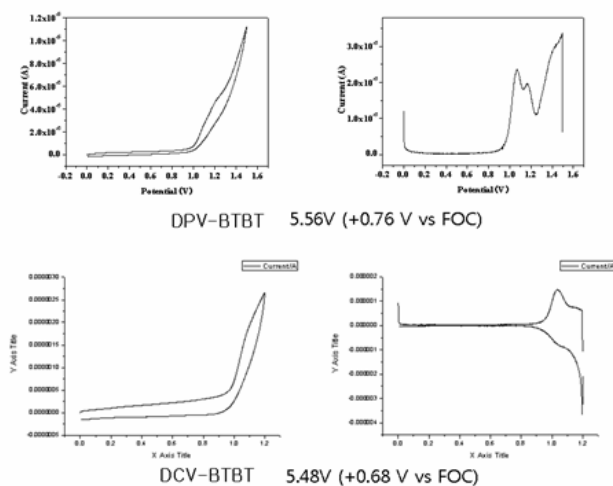

**Figure S5.** Cyclic voltammograms of DPV-BTBT and DCV-BTBT.

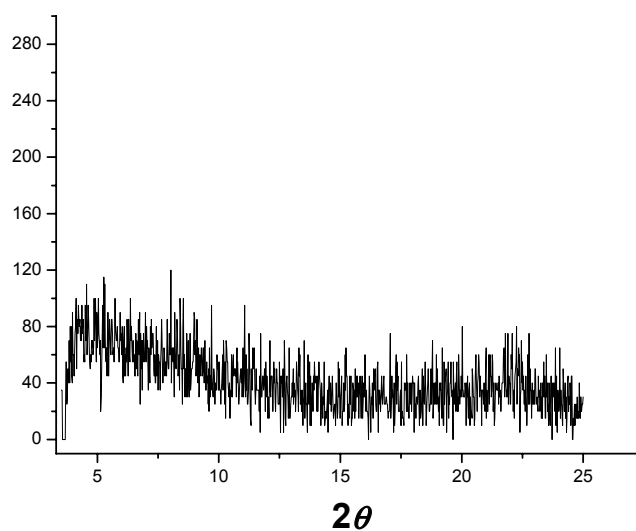

**Figure S6.** XRD pattern of DCV-BTBT thin films vacuum-deposited on OTS-treated  $\text{SiO}_2/\text{Si}$  at  $T_{\text{sub}} = 80^\circ\text{C}$ .

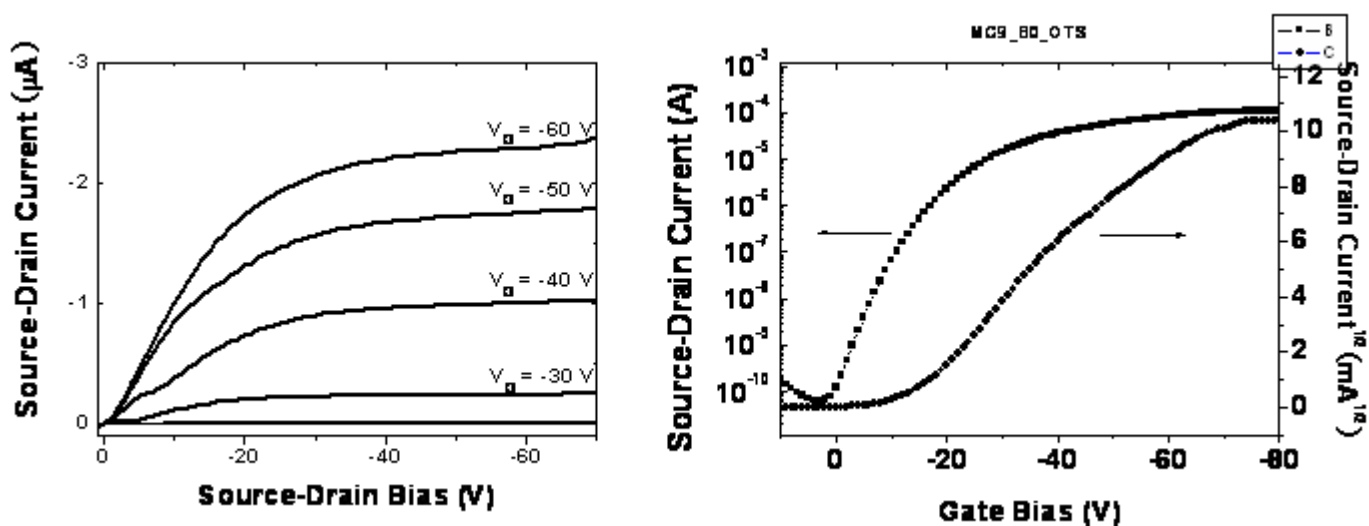

**Figure S7** Source-drain current ( $I_{DS}$ ) versus source-drain voltage ( $V_{DS}$ ) at various gate voltages ( $V_G$ ) for top-contact field-effect transistor using DPV-BTBT deposited at  $T_{sub} = 80\text{ }^\circ\text{C}$  on OTS-treated  $\text{SiO}_2$ . The transfer characteristics in the saturation regime at a constant source-drain voltage ( $V_{DS} = -100\text{ V}$ ) are also included (fresh device).

**Table S1** Field-effect mobility ( $\mu_{TFT}$ ), on/off current ratio ( $I_{on}/I_{off}$ ), and threshold voltage ( $V_{th}$ ) of DCV-BTBT vacuum-deposited on differently treated  $\text{SiO}_2$  surfaces and at different substrate temperature ( $T_{sub}$ )

|          |      | $T_{sub}$ | $\mu_{TFT}$<br>[ $\text{cm}^2/\text{Vs}$ ] | $I_{on}/I_{off}$ | $V_{th}$ [V] |
|----------|------|-----------|--------------------------------------------|------------------|--------------|
| DCV-BTBT | Bare | 25        | 0.00013                                    | $10^3$           | -24          |
|          |      | 50        | 0.0248                                     | $10^5$           | -40          |
|          | OTS  | 80        | 0.00013                                    | $10^3$           | -20          |
|          |      | 25        | 0.0031                                     | $10^4$           | -22          |
|          |      | 50        | 0.00139                                    | $10^4$           | -60          |
|          |      | 80        | 0.00015                                    | $10^3$           | -10          |
